# Supplementary material for: The extradomain a of fibronectin enhances the efficacy of lipopolysaccharide defective Salmonella bacterins as vaccines in mice
Source: PubMed Central journal article supplement (PMC3418186; doi:10.1186/1297-9716-43-31), 2012-04-19
Supplement: 1297-9716-43-31-S3.pdf [file 1297-9716-43-31-S3.pdf]

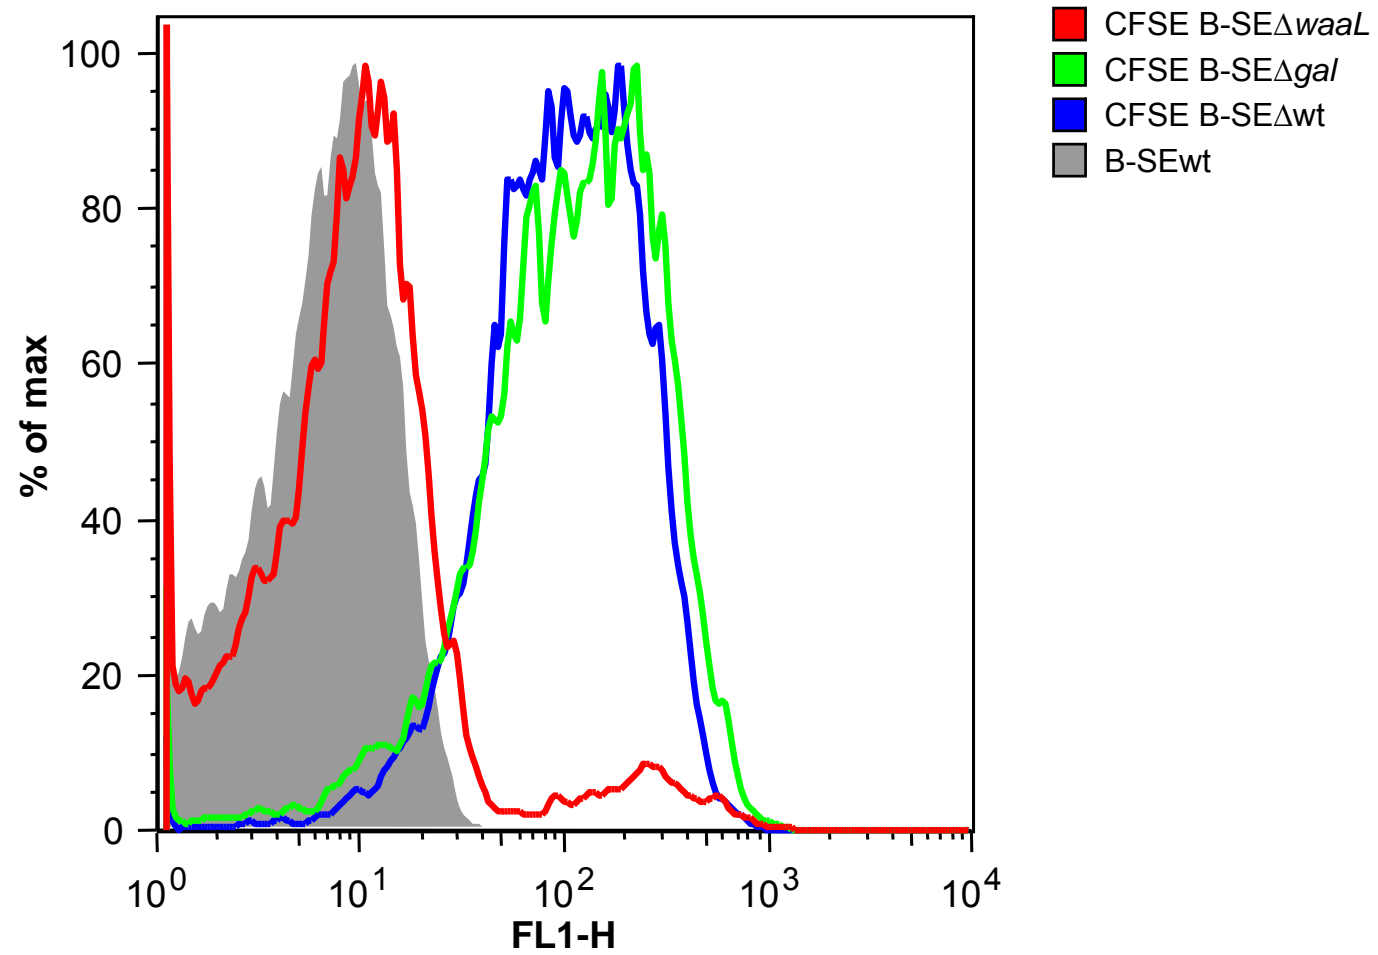

**Figure S2**
